# Supplementary material
Source: PubMed Central journal article supplement (PMC3194901)
Supplement: supp_193_21_5950__1.pdf [file supp_193_21_5950__1.pdf]

1 **Rational design of an artificial genetic switch: co-option of the H-NS-**  
2 **repressed *proU* operon by the VirB virulence master regulator.**

3

4

Kelly A. Kane and Charles J. Dorman\*

5

6

7

8

9

**SUPPLEMENTARY DATA FILE**

1 **Table S1: Primers**

| Oligonucleotides                   | Sequence (5' to 3') <sup>a b</sup>                                  |
|------------------------------------|---------------------------------------------------------------------|
| <i>icsB</i> fw                     | tgtacctcgtgagcatatgtagt                                             |
| <i>icsB</i> rev                    | ggggcattgattgcagttt                                                 |
| <i>proU</i> rev +230.XbaI          | <u>tttctagat</u> atctcgccttcttcaatgg                                |
| <i>proU</i> fw -270.NotI           | ttt <u>cgggccgc</u> ctacccgcagcagggaaata                            |
| <i>proU</i> fw -150.NotI           | ttt <u>cgggccgc</u> ctcgcctatctttgacaaaatc                          |
| <i>proU</i> fw -60.NotI            | ttt <u>cgggccgc</u> gccacattgccatcaggg                              |
| <i>proU</i> SDM FseI fw            | tttgcctcgcataatattcaGGCCGGCCttgccatcaggggtgcctc                     |
| <i>proU</i> SDM FseI rev           | gaggcaaccctgatggcaaGGCCGGCCtgaatattgatgcgcaaa                       |
| <i>yaеT</i> fw.SmaI                | ttt <u>ccggga</u> aagaacgtaacactgtagct                              |
| <i>yaеT</i> rev. NotI              | ttt <u>cgggccgc</u> gacaggtcggcgtcatctg                             |
| <i>tet</i> .40 bp <i>proU</i> fw   | <u>aagactggaattctgaggggtgtattttcaaaat</u> atctcattaagaccactttcacatt |
| <i>tet</i> .40 bp <i>proU</i> rev  | <u>cgcggcactgtacccgctggcgtggtatcccacggatt</u> actaagcagttgtctcctg   |
| <i>icsB</i> .fw.40 bp <i>proU</i>  | <u>aagactggaattctgaggggtgtattttcaaaat</u> atctgtacctcgtgagcatatgt   |
| <i>icsB</i> .rev.40 bp <i>proU</i> | <u>aagactggaattctgaggggtgtattttcaaaat</u> atcgggggattgattgcagttt    |
| <i>cat</i> .rev.40 bp <i>proU</i>  | <u>cgcggcactgtacccgctggcgtggtatcccacggatt</u> acactattcagcgtagcag   |
| <i>rho</i> .RT.fw                  | gttgtagtcgatagccgcga                                                |
| <i>rho</i> .RT.rev                 | tacaggcaacatggaactgc                                                |
| P1.RT.fw                           | cttatatcacggaaattcc                                                 |
| P2.RT.fw                           | gggtaatatatcgacatagac                                               |
| <i>gfp</i> .RT.rev                 | agtgaaaagtcttctcct                                                  |

2 <sup>a</sup> Underlined nucleotides represent restriction enzyme sites used for cloning

3 <sup>b</sup> Capitol letters indicated base pair substitutions made in site-directed mutagenesis

1 **VirB dependent de-repression of *proU* is mediated by promoter P2 and not P1.** To  
2 determine which promoter was responding to VirB mediated de-repression, qRT-PCR  
3 was performed with the chromosomal integrations of pZep-*proU*-1, pZep-*proU*-2M and  
4 pZep-*proU*-2. These hybrid promoters were inserted into the native *proU* locus in both  
5 wild type and *hns* strains of *S. flexneri*. To differentiate between transcripts originating at  
6 the *proU* P1 and P2 promoters, forward primers specific for detection of transcripts from  
7 either P1 (P1 fw) or P1 and P2 combined (P2 fw) were used (Fig. S1A). The results from  
8 both P1 fw and P2 fw primers confirmed that expression from the VirB de-repressed  
9 *proU* was mediated by the P2 promoter and not the adjacent P1 promoter. Just as had  
10 been seen in the plasmid-based experiments, constructs with the VirB binding site at  
11 position -270 (pZep-*proU*-2) of the *proU* P2 promoter was derepressed in the *S. flexneri*  
12 wild type background to levels similar to those seen in the *hns* mutant. With the mutated,  
13 non-functional VirB binding site inserted at the same position (pZep-*proU*-2M), VirB  
14 dependent derepression was not observed (Fig. S1B).

15

16

17

18

19

20

21

22

23

24

25

1 **FIG S1.** Transcription from derepressed *proU* promoters is mediated by promoter P2,  
2 not P1. A. Schematic of pZep-*proU*-2, the modified *proU* promoter that was integrated  
3 into the *proU* locus on the chromosome. Primers P1 fw, P2 fw and *gfp* rev are indicated  
4 with arrows. B. Quantitative PCR measurements of gene transcript levels (arbitrary  
5 values) from promoter P1 (primer sets P1 fw and *gfp* rev), and promoter P2 (P2 fw and  
6 *gfp* rev). Measurements were taken from wild type cells with pZep-*proU*-2M (mutated  
7 binding site at position -270) inserted, wild type cells with the pZep-*proU*-2 (functional  
8 VirB binding site at position -270) inserted, and *hns* cells also harboring pZep-*proU*-2 in  
9 place of native *proU*. All experiments were conducted with bacteria grown under  
10 repressive conditions in 0 mM NaCl growth medium.

11

12

13

14

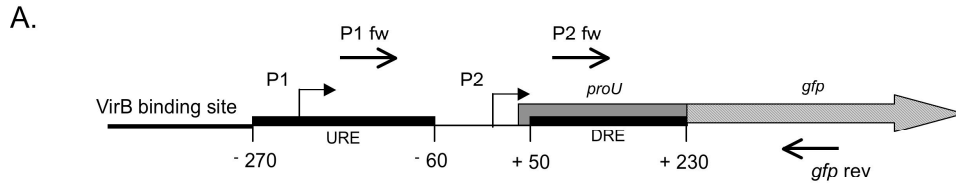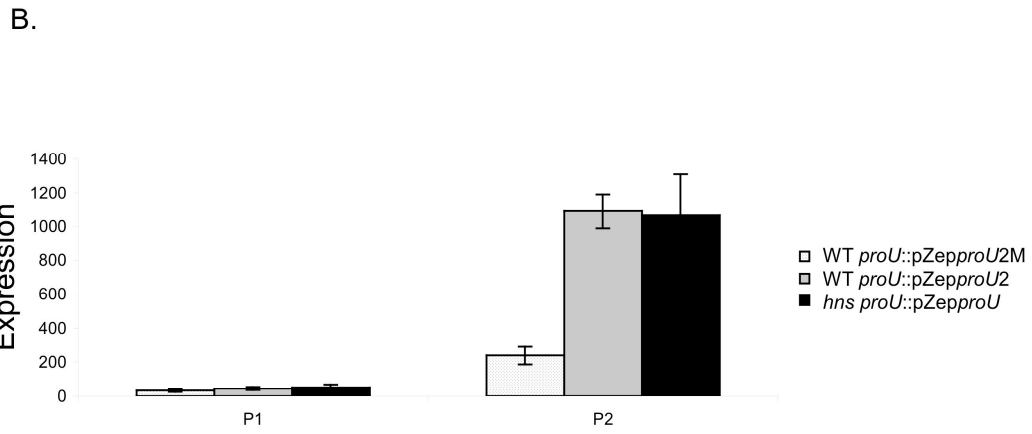

1 Supplementary Data: Figure S1
